# Supplementary material for: Rational design of selective HDAC2 inhibitors for liver cancer treatment: computational insights into the selectivity mechanism through molecular dynamics simulations and QM/MM calculations
Source: Royal Society of Chemistry journal article supplement (doi:10.1039/d1cp02264d), 2021-01-01
Supplement: d1cp02264d1.pdf [file d1cp02264d1.pdf]

## Supplementary Material

### **Rational design of selective HDAC2 inhibitors for liver cancer treatment: computational insights into the selectivity mechanism through molecular dynamics simulations and QM/MM calculation**

Ye Yang<sup>1,2,3</sup>, Baichun Hu<sup>1,2,3</sup>, Yi Yang<sup>1,2,3</sup>, Kaihua Gong<sup>1,2,3</sup>, Huibin Wang<sup>1,2,3</sup>, Qi Guo<sup>1,2,3</sup>,  
Xinjie Tang<sup>1,2,3</sup>, Yujuan Li<sup>4\*</sup>, Jian Wang<sup>1,2,5\*</sup>

<sup>1</sup>Key Laboratory of Structure-Based Drug Design & Discovery, Ministry of Education, Shenyang  
Pharmaceutical University, Shenyang 110016, Liaoning 110016, China

<sup>2</sup>Key Laboratory of Intelligent Drug Design and New Drug Discovery of Liaoning Province,  
Shenyang Pharmaceutical University, Shenyang 110016, China

<sup>3</sup>School of Pharmacy, Shenyang Pharmaceutical University, Shenyang 110016, China

<sup>4</sup>School of Medical Devices, Shenyang Pharmaceutical University, Shenyang 110016, China

<sup>5</sup>School of Pharmaceutical Engineering, Shenyang Pharmaceutical University, Shenyang 110016,  
China

Ye Yang and Baichun Hu contribute equally to this paper.

\* Corresponding author. Prof. Li: Tel: +86 24 43520351; E-mail address: liyj201102@163.com;

Prof. Wang: Tel.: +86 24 43520227; E-mail address: jianwang@syphu.edu.cn.

## Table of contents

|                       |           |
|-----------------------|-----------|
| <b>Figure S1.....</b> | <b>3</b>  |
| <b>Figure S2.....</b> | <b>4</b>  |
| <b>Figure S3.....</b> | <b>5</b>  |
| <b>Figure S4.....</b> | <b>6</b>  |
| <b>Figure S5.....</b> | <b>7</b>  |
| <b>Figure S6.....</b> | <b>8</b>  |
| <b>Figure S7.....</b> | <b>9</b>  |
| <b>Figure S8.....</b> | <b>10</b> |

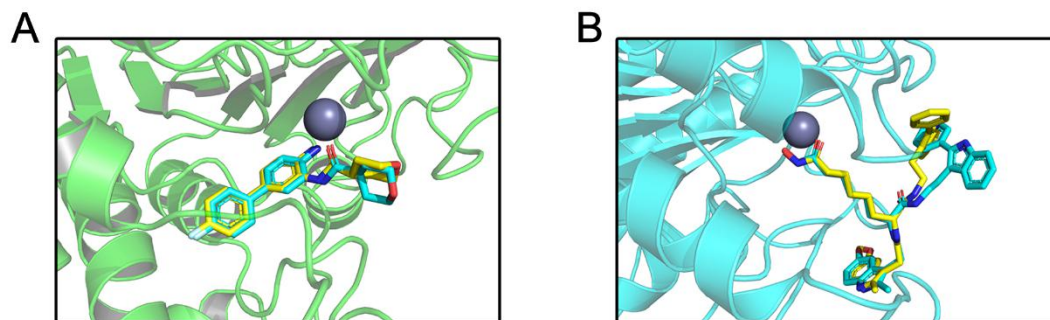

**Figure S1.** Comparison of the docked and experimental crystallographic conformations for (A) HDAC2, RMSD 0.341 Å (PDB code:5IWG) and (B) HDAC8, RMSD 0.462 Å (PDB code: 2V5X). The original conformation of the co-crystal ligands obtained from X-ray diffraction were indicated as blue sticks, and the docked poses were represented as yellow sticks.

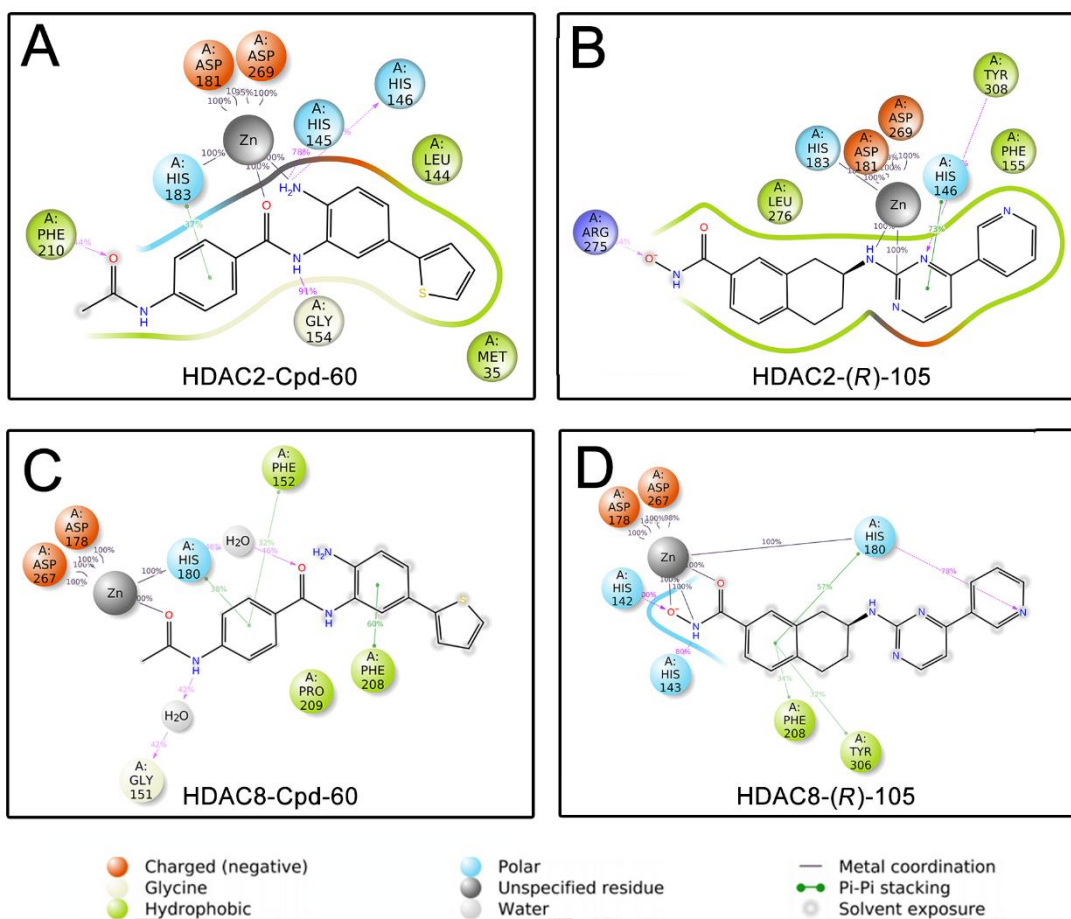

**Figure S2.** 2D-ligand contact image of ligand-protein complex in the active cavity. (A)HDAC2/Cpd-60; (B)HDAC2/(R)-105; (C)HDAC8/Cpd-60; (D) HDAC8/(R)-105.

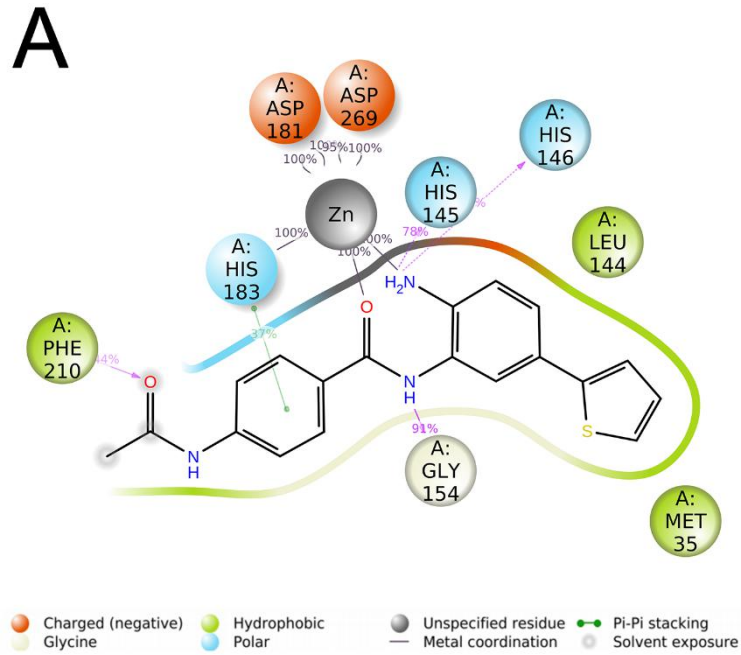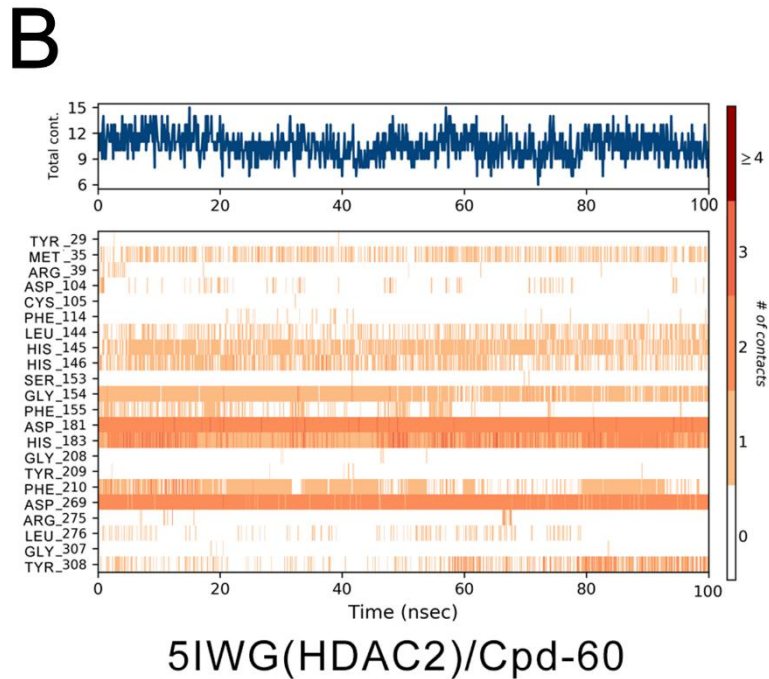

**Figure S3.** Ligand-Protein contacts of HDAC2/Cpd-60 complex obtained from MD simulation over the entire 100 ns. (A) 2D-ligand contact image of ligand-protein complex in the active cavity. (B) The top graph showed the total number of specific protein-ligand interactions during the simulation. The bottom panel indicated specific residues which interact with the ligand during the simulation. Some residues made more than one specific contact with the ligand, which was represented by a darker degree of orange, according to the scale on the right of the plot.

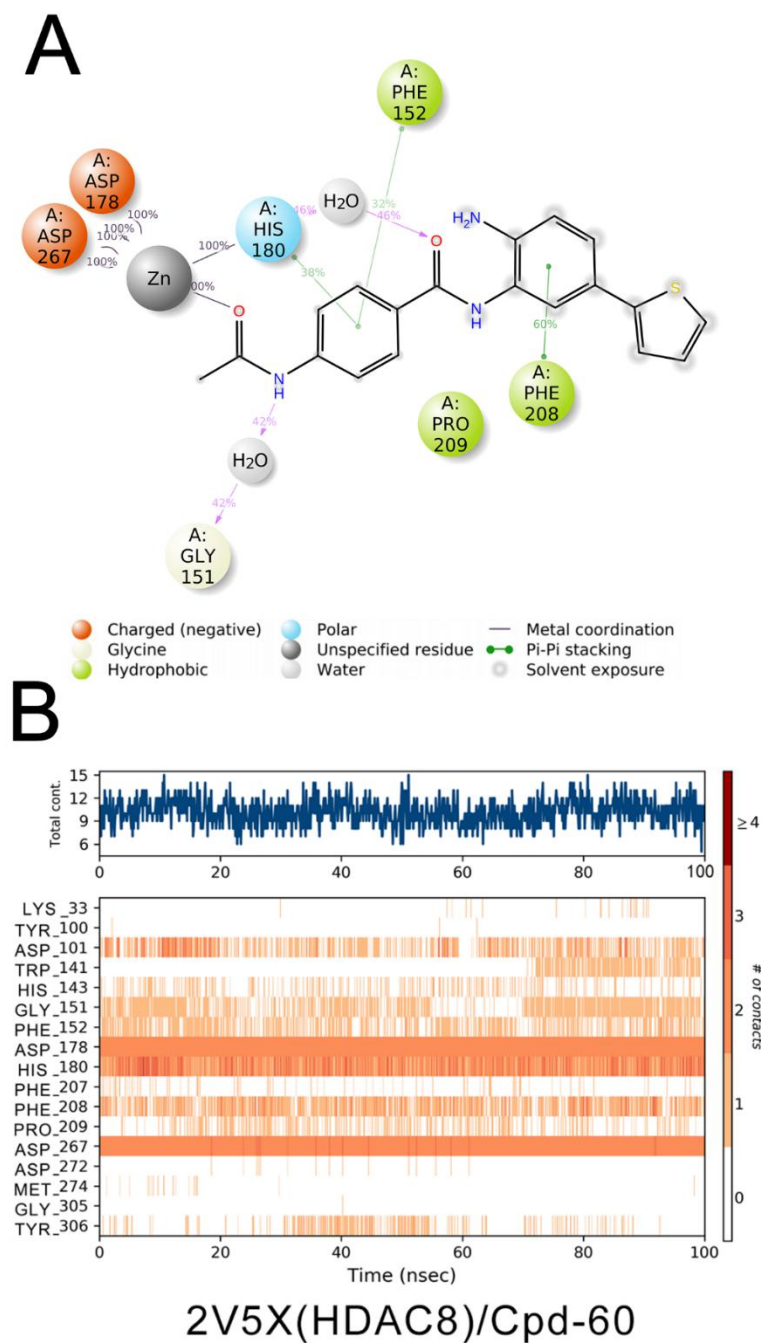

**Figure S4.** Ligand-Protein contacts of HDAC8/Cpd-60 complex obtained from MD simulation over the entire 100 ns. (A) 2D-ligand contact image of ligand-protein complex in the active cavity. (B) The top graph showed the total number of specific protein-ligand interactions during the simulation. The bottom panel indicated specific residues which interact with the ligand during the simulation. Some residues made more than one specific contact with the ligand, which was represented by a darker degree of orange, according to the scale on the right of the plot.

**A**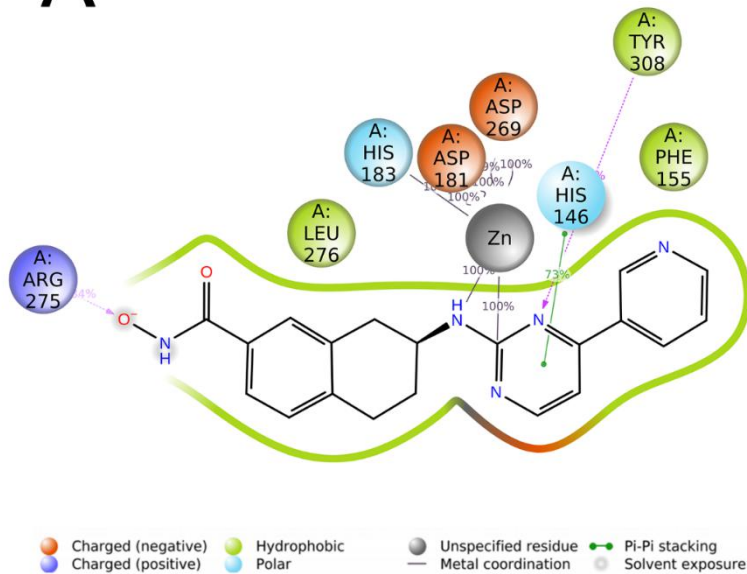**B**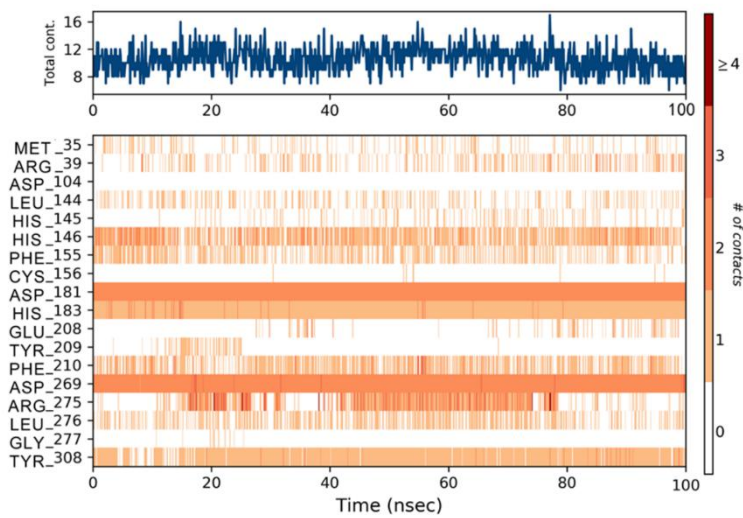**5IWG(HDAC2)/(R)-105**

**Figure S5.** Ligand-Protein contacts of HDAC2/(R)-105 complex obtained from MD simulation over the entire 100 ns. (A) 2D-ligand contact image of ligand-protein complex in the active cavity. (B) The top graph showed the total number of specific protein-ligand interactions during the simulation. The bottom panel indicated specific residues which interact with the ligand during the simulation. Some residues made more than one specific contact with the ligand, which was represented by a darker degree of orange, according to the scale on the right of the plot.

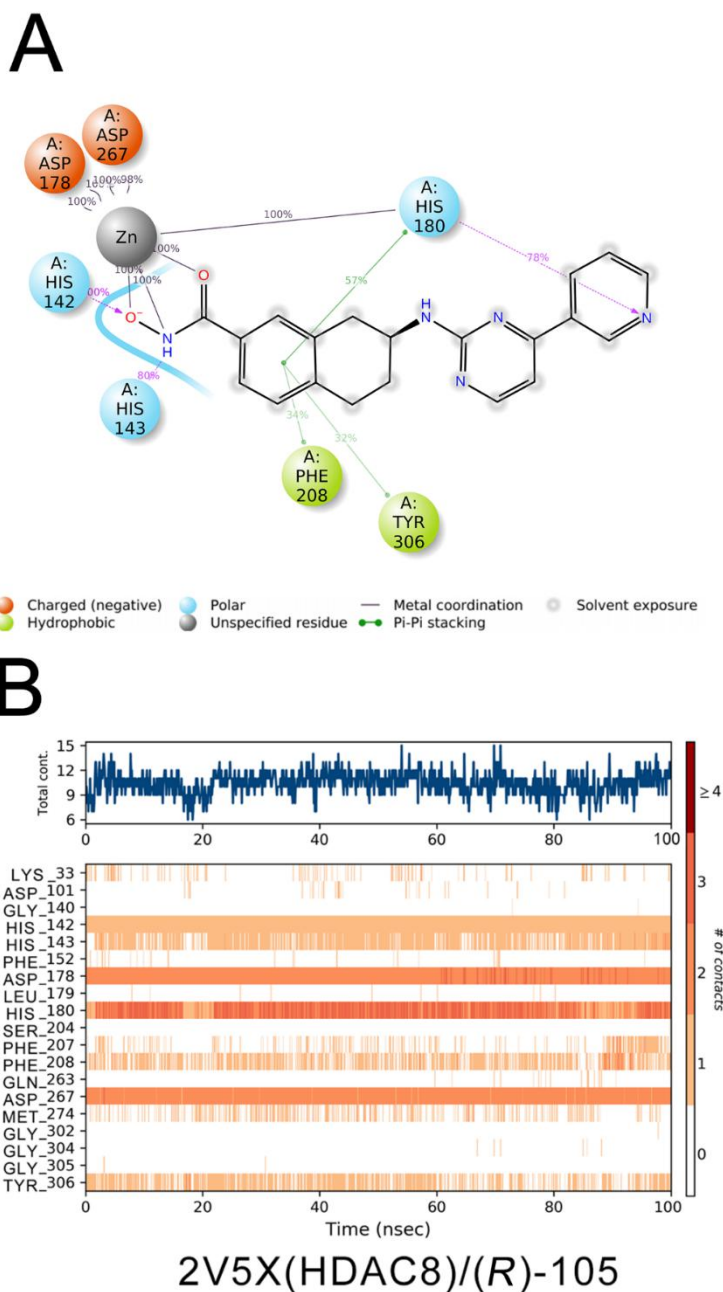

**Figure S6.** Ligand-Protein contacts of HDAC8/(R)-105 complex obtained from MD simulation over the entire 100 ns. (A) 2D-ligand contact image of ligand-protein complex in the active cavity. (B) The top graph showed the total number of specific protein-ligand interactions during the simulation. The bottom panel indicated specific residues which interacted with the ligand during the simulation. Some residues made more than one specific contact with the ligand, which was represented by a darker degree of orange, according to the scale on the right of the plot.



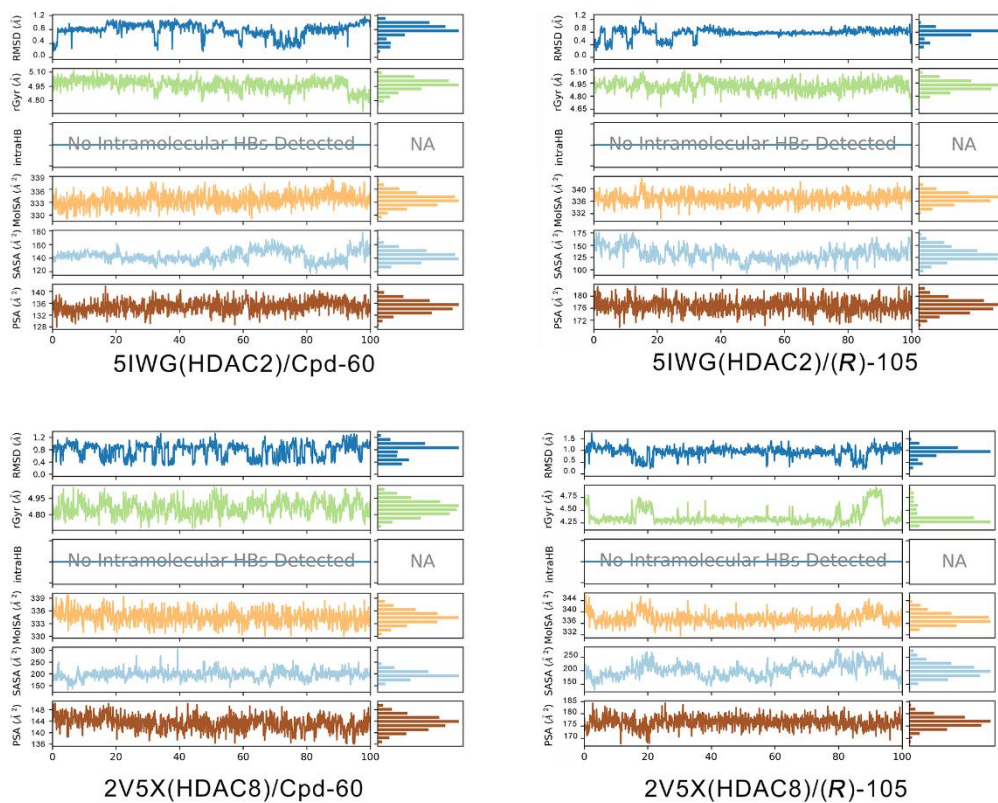

**Figure S7.** Ligands' five properties obtained from MD simulation over the entire 100 ns for complexes.

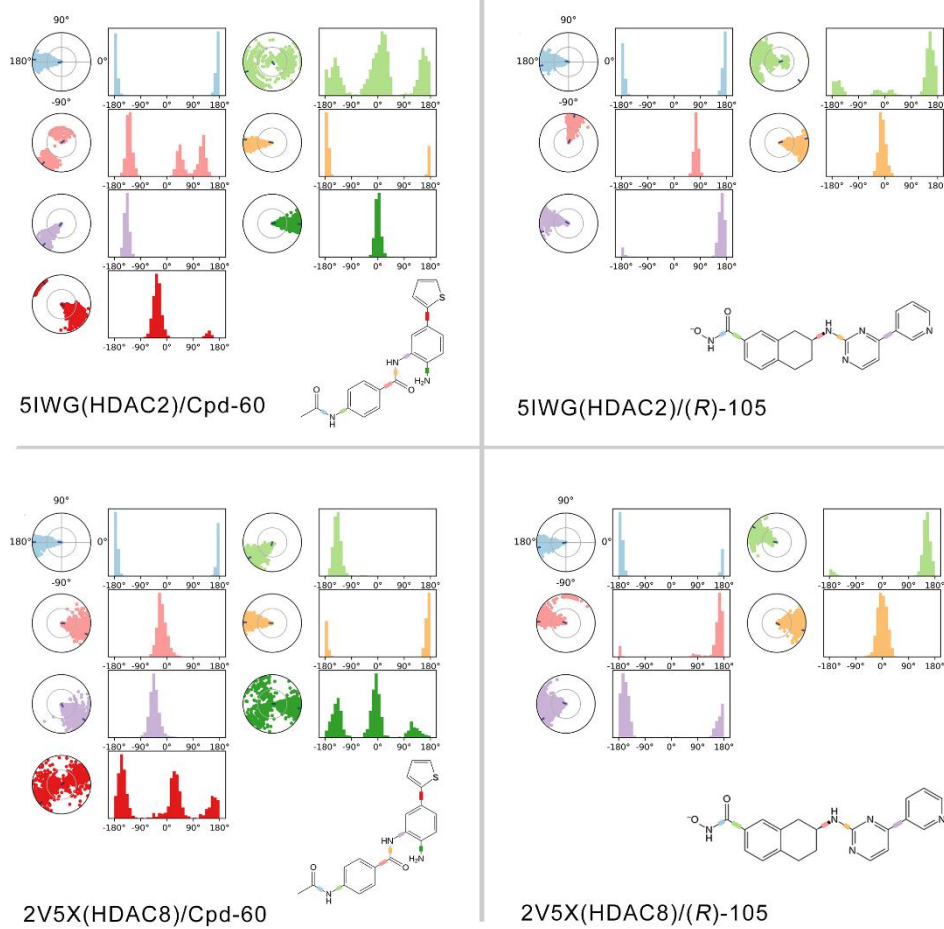

**Figure S8.** Ligand Torsion Profile obtained from MD simulation over the entire 100 ns for complexes.
